# Supplementary material for: RecA filament sliding on DNA facilitates homology search
Source: PubMed Central journal article supplement (PMC3510455; doi:10.7554/elife.00067), 2012-12-13
Supplement: elife00067s001.pdf [file elife00067s001.pdf]

## Materials and Methods-Source Data 1. DNA sequences used in measurements

| Name                 | DNA sequence (5' -> 3')                                                                          | Experiment                                     |
|----------------------|--------------------------------------------------------------------------------------------------|------------------------------------------------|
| biotin_DNA           | /Biotin/TGG CGA CGG CAG CGA<br>GGC/Cy5/                                                          | For template<br>ssDNA<br>immobilization        |
| Nh21+_template       | CTT TTC ATC ACG TTG TTA GAT GCC<br>TCG CTG CCG TCG CCA                                           | Non-<br>homologous<br>ssDNA<br>sequence, 21nt  |
| Nh39+_template       | TTT ACT TGT ACT TCA TTC ATT CAC<br>ATT CCT ATC ATG TTT GCC TCG CTG<br>CCG TCG CCA                | Non-<br>homologous<br>ssDNA<br>sequence, 39nt  |
| T30 Nh39+_template   | T30 TTT ACT TGT ACT TCA TTC ATT<br>CAC ATT CCT ATC ATG TTT GCC TCG<br>CTG CCG TCG CCA            | Non-<br>homologous ss<br>DNA sequence,<br>69nt |
| T60 Nh39+_template   | T60 TTT ACT TGT ACT TCA TTC ATT<br>CAC ATT CCT ATC ATG TTT GCC TCG<br>CTG CCG TCG CCA            | Non-<br>homologous<br>ssDNA<br>sequence, 99nt  |
| 99nt_3color_template | T60 TTT AC/Cy7-dT/ TGT ACT TCA TTC<br>ATT CAC ATT CCT ATC ATG TTT GCC<br>TCG CTG CCG TCG CCA     | Template for 3-<br>color<br>experiments        |
| poly T50             | T50 GCC TCG CTG CCG TCG CCA                                                                      | poly T DNA                                     |
| 2X 6bp pdT           | TTT TTT TTT TTT TTT TTT TTT TTT TTT<br>TTT TTT GTT CAT TTT TTG TTC ATG<br>CCT CGC TGC CGT CGC CA | HS1 and HS2<br>6bp homology                    |
| 1X 6bp end pdT       | TTT TTT TTT TTT TTT TTT TTT TTT TTT<br>TTT TTT TTT TTT TTT TTG TTC ATG CCT<br>CGCTGC CGT CGC CA  | HS1 6bp<br>homology                            |
| 1X 6bp mid pdT       | TTT TTT TTT TTT TTT TTT TTT TTT TTT<br>TTT TTT GTT CAT TTT TTT TTT TTG CCT<br>CGC TGC CGT CGC CA | HS2 6bp<br>homology                            |
| 2X 7bp pdT           | TTT TTT TTT TTT TTT TTT TTT TTT TTT<br>TTA CGT TCA TTT TTT TCG TTC ATG<br>CCT CGC TGC CGT CGC CA | HS1 and HS2<br>7bp homology                    |
| 2X 8bp pdT           | TTT TTT TTT TTT TTT TTT TTT TTT TTT<br>TTA CGT TCA TTT TTT ACG TTC ATG<br>CCT CGC TGC CGT CGC CA | HS1 and HS2<br>8bp homology                    |
| 31+                  | ATG AGC GCC ACT TTT CAT CAC GTT<br>GTT AGA T                                                     | For dsDNA<br>31bp                              |
| 31-                  | ATC TAA CAA CGT GAT GAA AAG TGG<br>CGC TCA T                                                     | 31+<br>complement                              |

|     |                                                                                       |                   |
|-----|---------------------------------------------------------------------------------------|-------------------|
| 39+ | ATG AAC GTC GCG GGT GAT CTG AAT<br>ATC AAT CTC TAA GCT                                | For dsDNA<br>39bp |
| 39- | AGC TTA GAG ATT GAT ATT CAG ATC<br>ACC CGC GAC GTT CAT                                | 39+<br>complement |
| 45+ | GCA TAC ATG AAC GTC GCG GGT GAT<br>CTG AAT ATC AAT CTC TAA GCT                        | For dsDNA<br>45bp |
| 45- | AGC TTA GAG ATT GAT ATT CAG ATC<br>ACC CGC GAC GTT CAT GTA TGC                        | 45+<br>complement |
| 60+ | ATC TAA CAA CCT GAT GAA AAG ATG<br>AAC GTC GCG GGT GAT CTG AAT ATC<br>AAT CTC TAA GCT | For dsDNA<br>60bp |
| 60- | AGC TTA GAG ATT GAT ATT CAG ATC<br>ACC CGC GAC GTT CAT CTT TTC ATC<br>AGG TTG TTA GAT | 60+<br>complement |
